# Supplementary material for: EGFL7 enhances surface expression of integrin α5β1 to promote angiogenesis in malignant brain tumors
Source: PubMed Central journal article supplement (PMC6127886; doi:10.15252/emmm.201708420), 2018-08-02
Supplement: EMMM-10-e8420-s002.pdf [file EMMM-10-e8420-s002.pdf]

**F**      Fn                    +    +  
                 E7                    +    +

**Blot:**

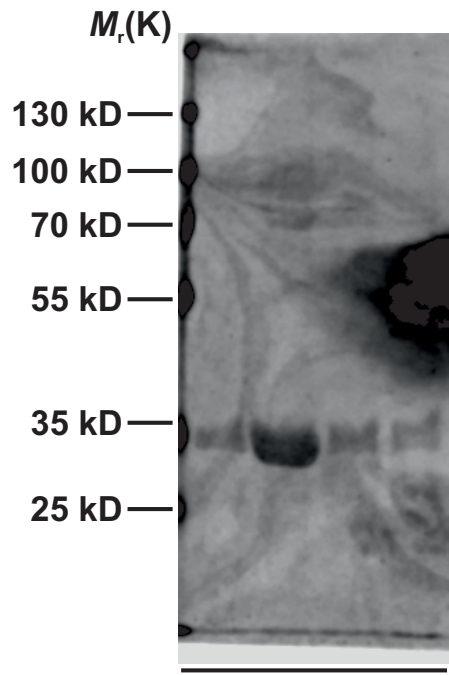

**Anti-Cdc42**

**IP Cdc42**

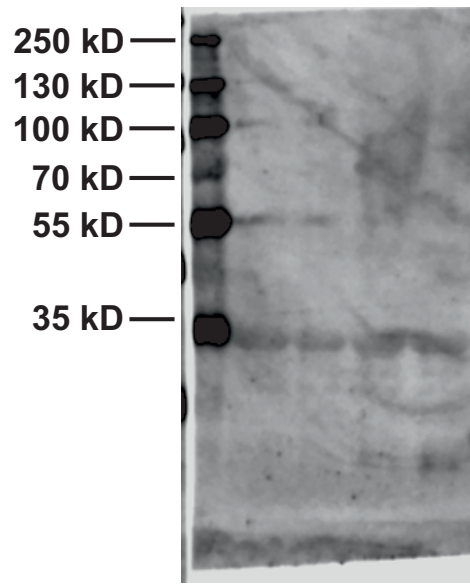

**Anti-Rac1**

**IP Rac1**

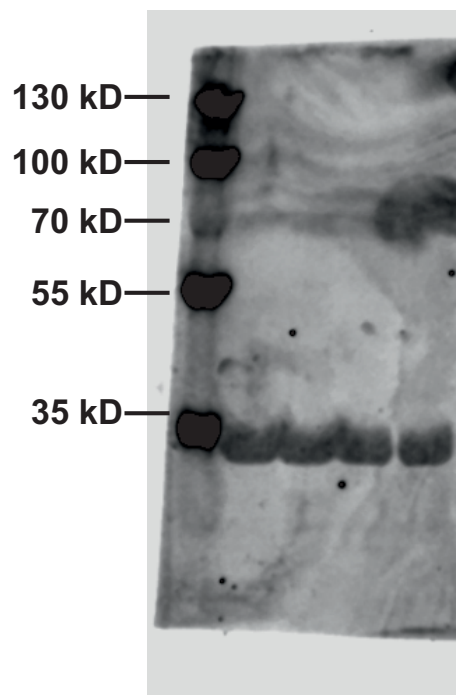

**Anti-RhoA**

**IP RhoA**
